# Supplementary material for: Investigation of the Conditions for the Synthesis of Poly(3,4-ethylenedioxythiophene) ATRP Macroinitiator
Source: MDPI journal article supplement (doi:10.3390/polym15020253), 2023-01-04
Supplement: s1 [file s1]

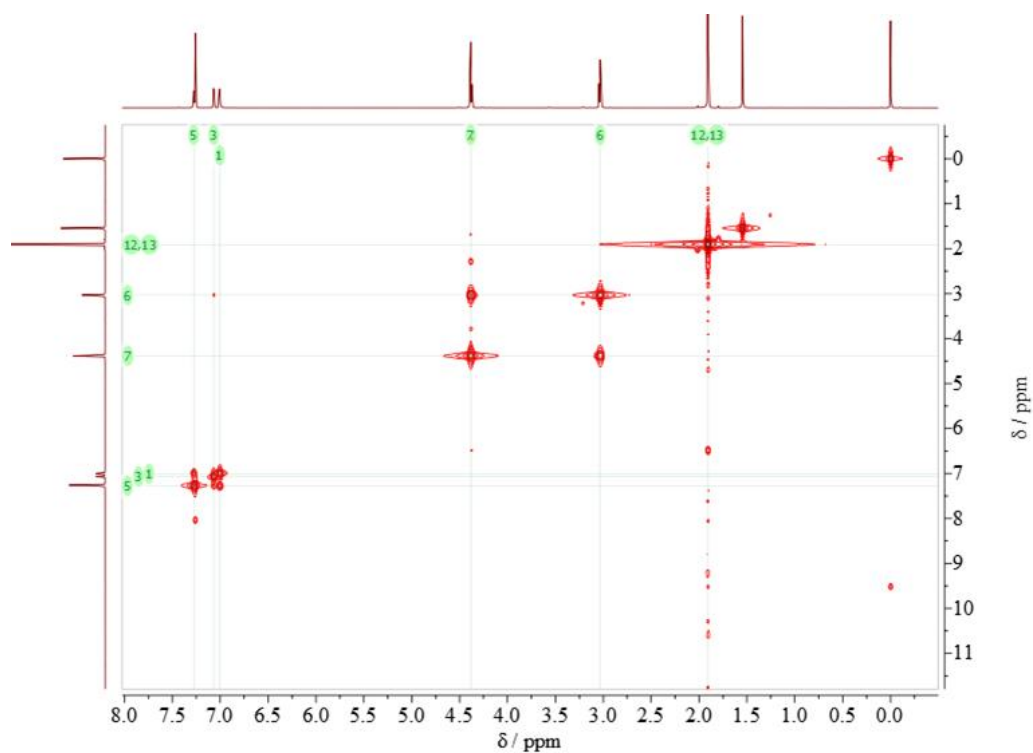

Figure S1. COSY spectrum of ThBr monomer

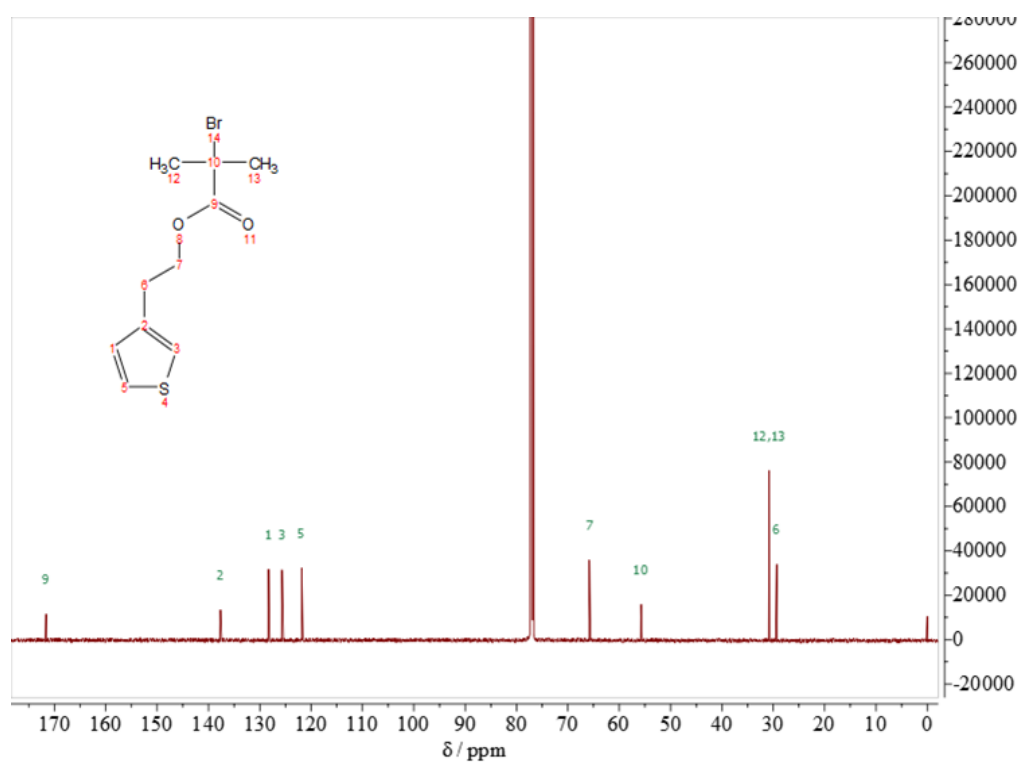

Figure S2.  $^{13}\text{C}$  spectrum of ThBr monomer

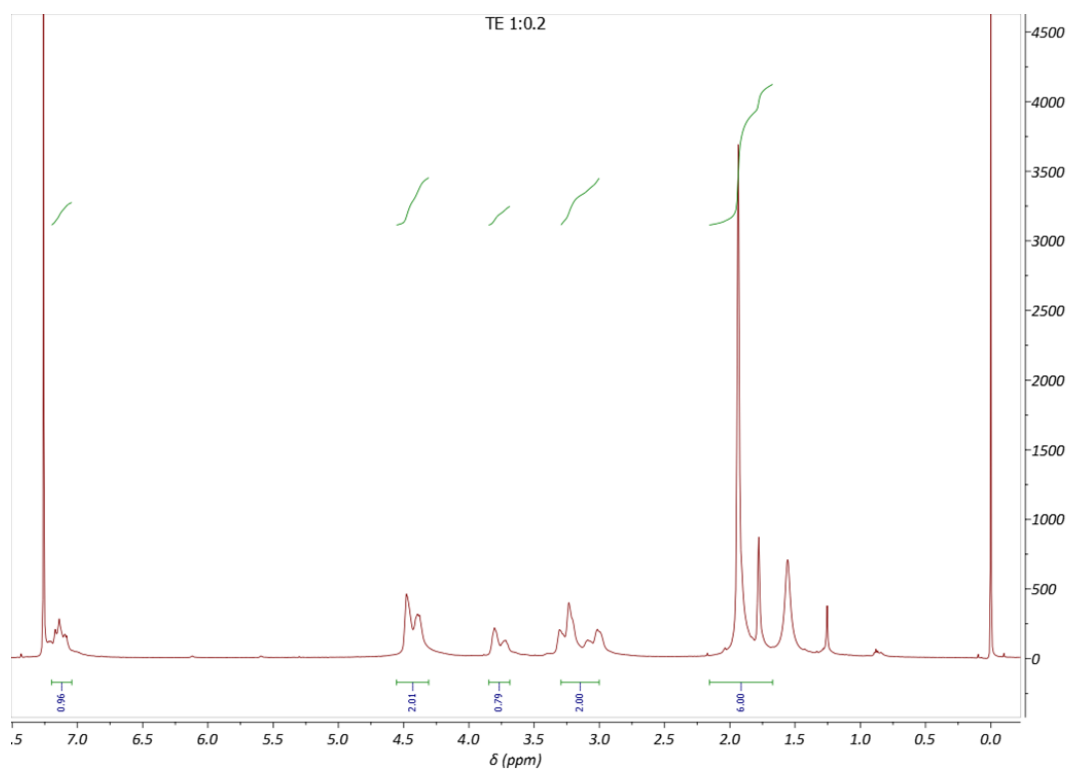

Figure S3.  $^1\text{H}$  NMR spectrum of product TE-1:0.2

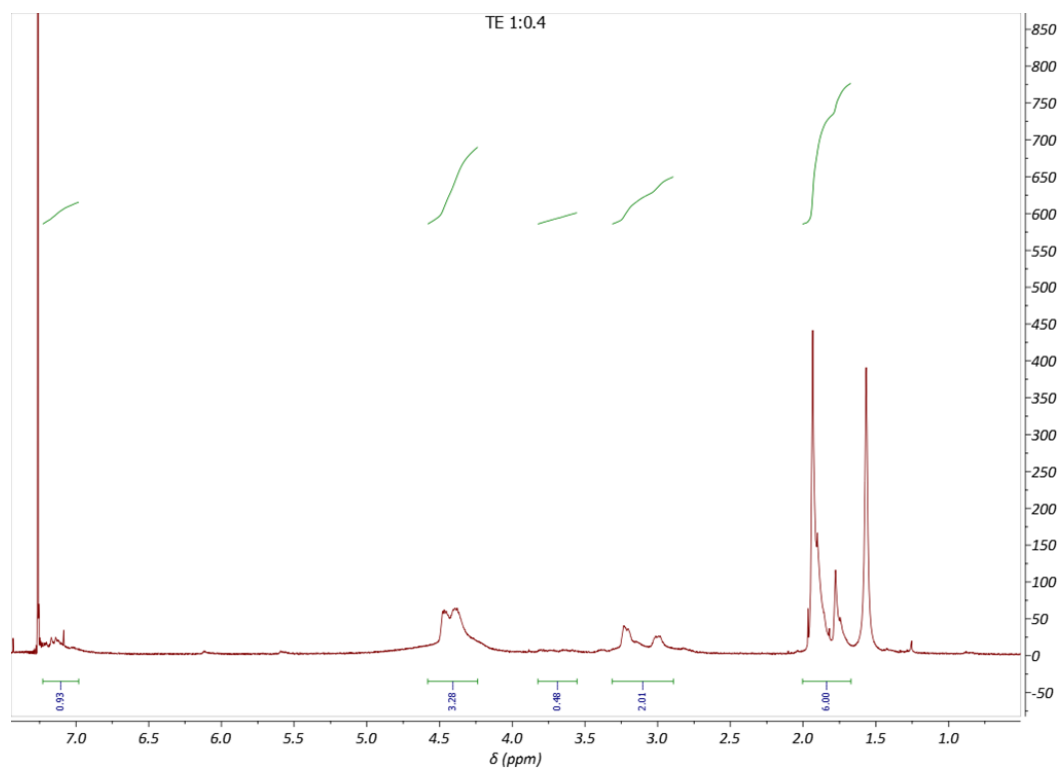

Figure S4.  $^1\text{H}$  NMR spectrum of product TE 1:0.4

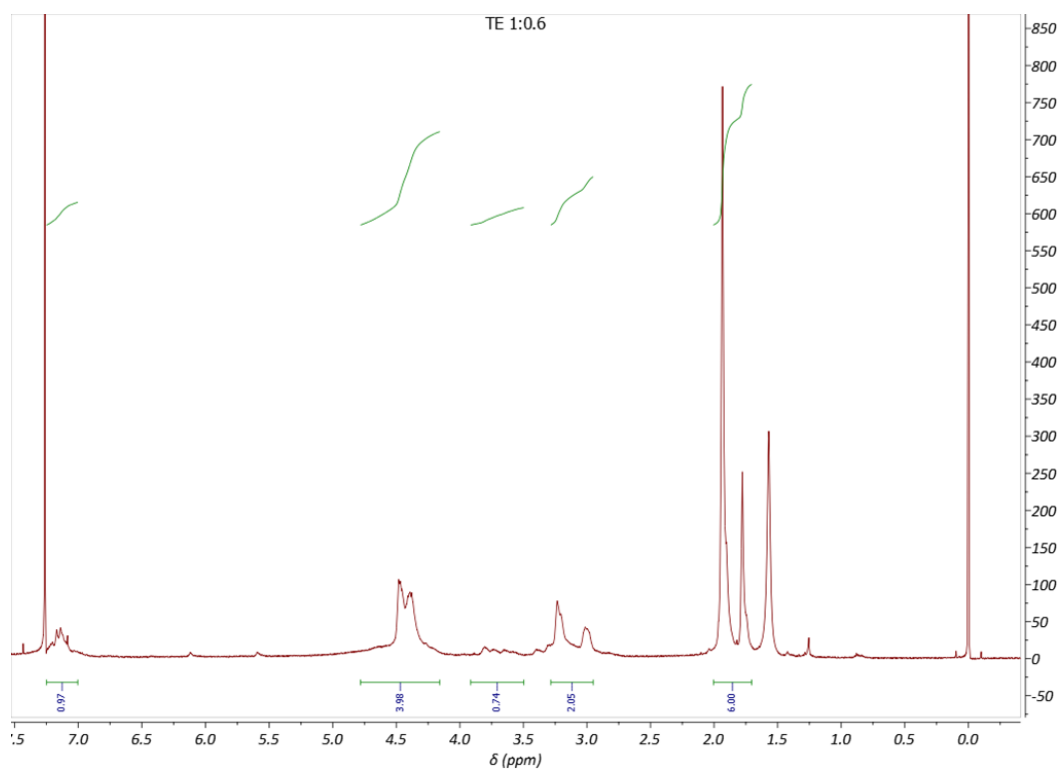

Figure S5.  $^1\text{H}$  NMR spectrum of product TE 1:0.6

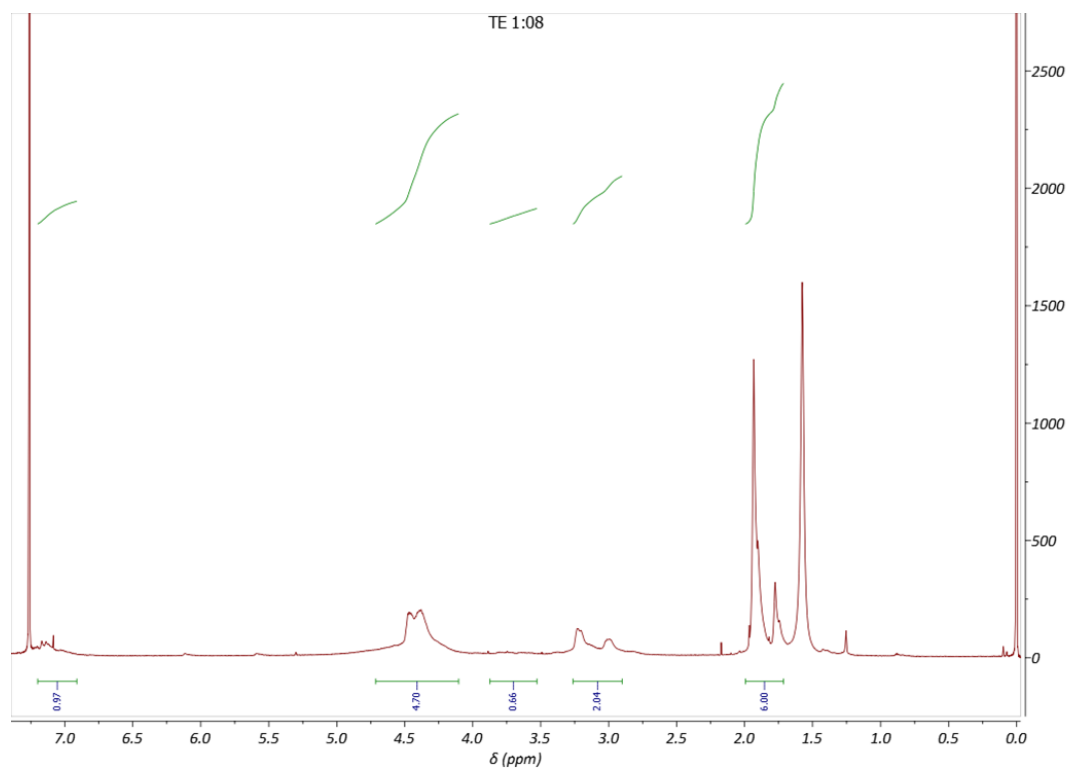

Figure S6.  $^1\text{H}$  NMR spectrum of product TE 1:0.8

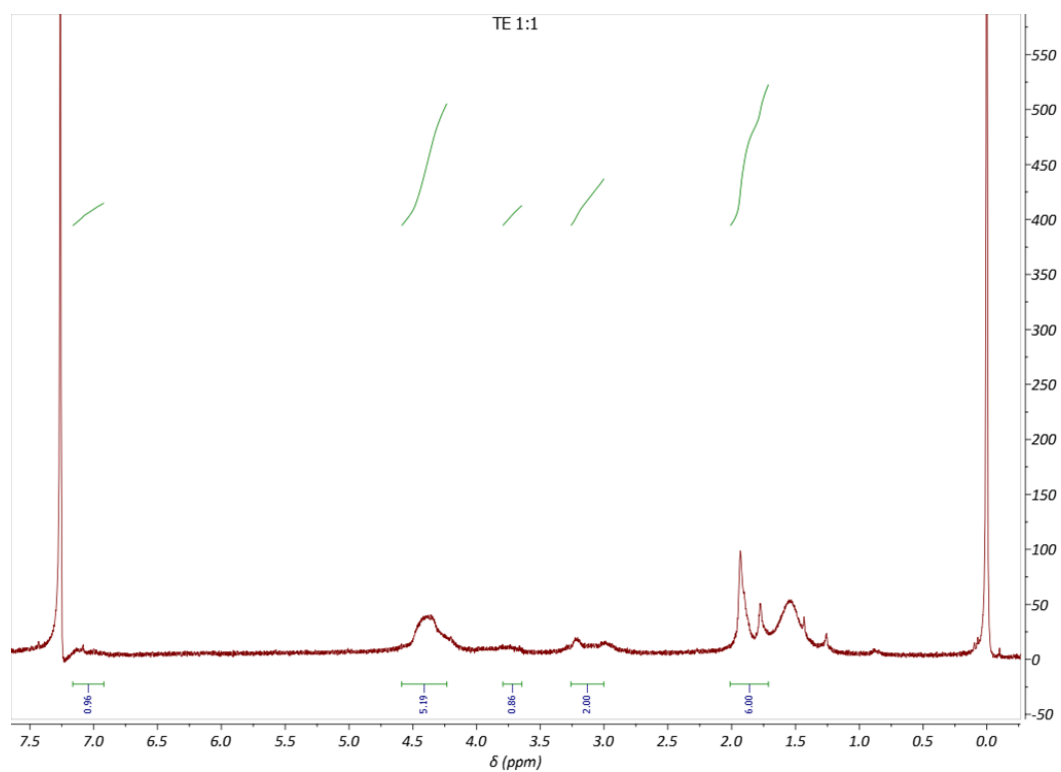

Figure S7.  $^1\text{H}$  NMR spectrum of product TE 1:1

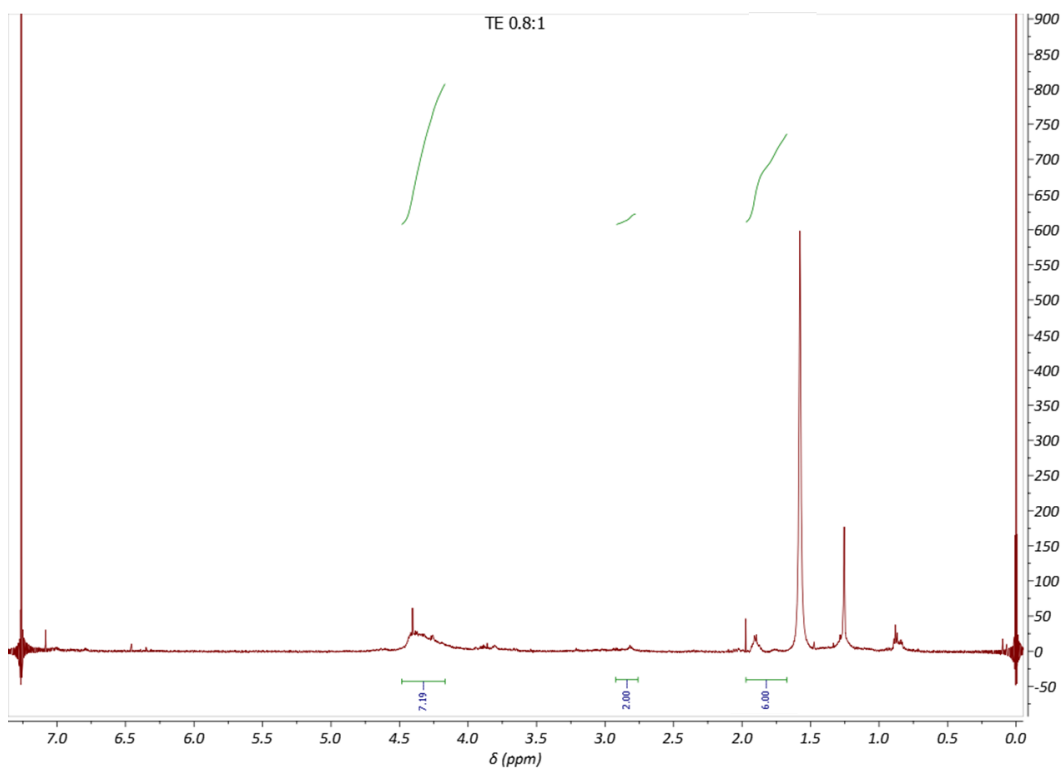

Figure S8.  $^1\text{H}$  NMR spectrum of product TE 0.8:1

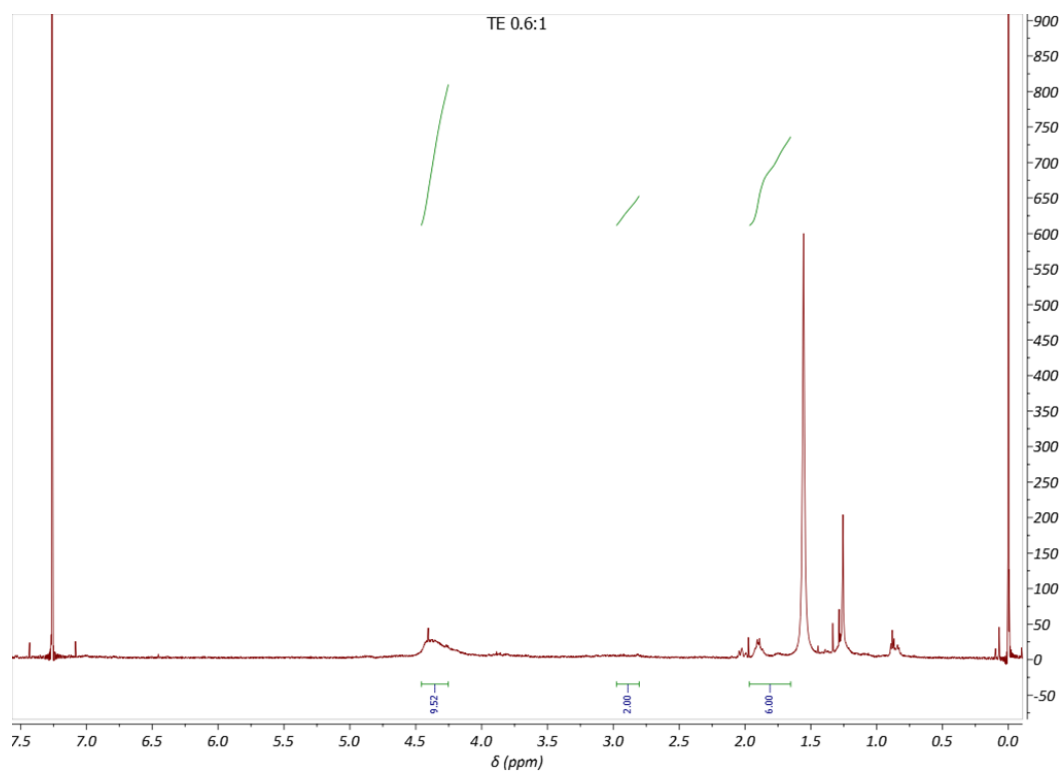

Figure S9.  $^1\text{H}$  NMR spectrum of product TE 0.6:1

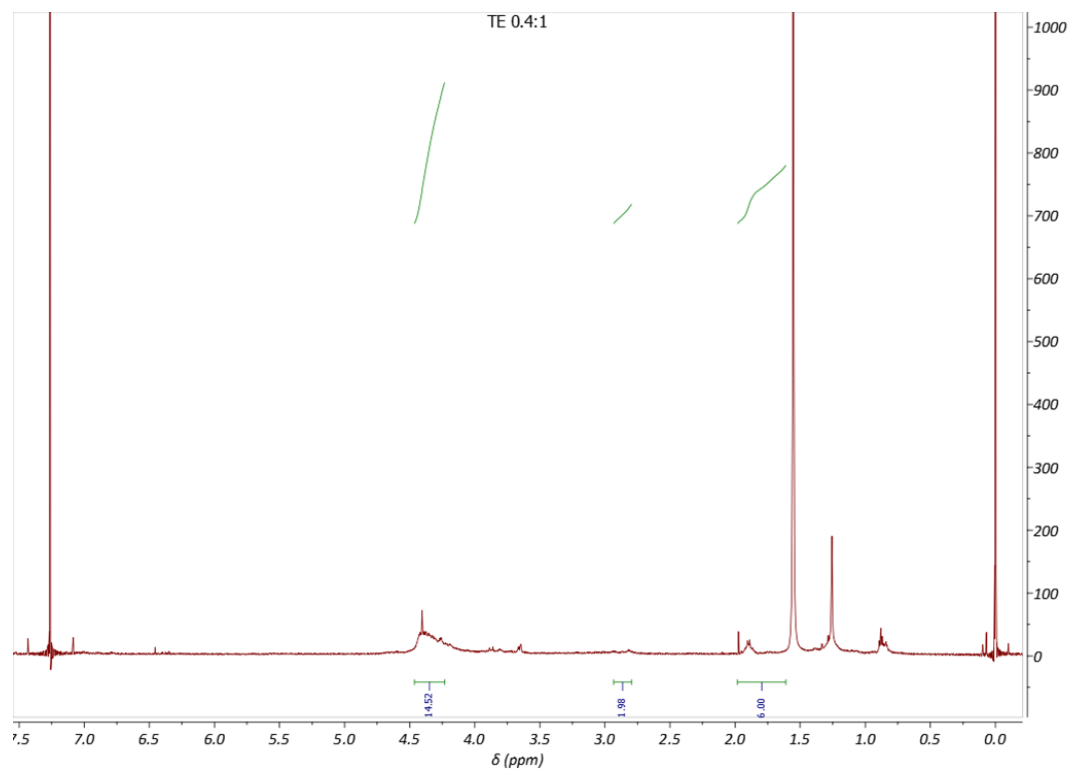

Figure S10.  $^1\text{H}$  NMR spectrum of product TE 0.4:1

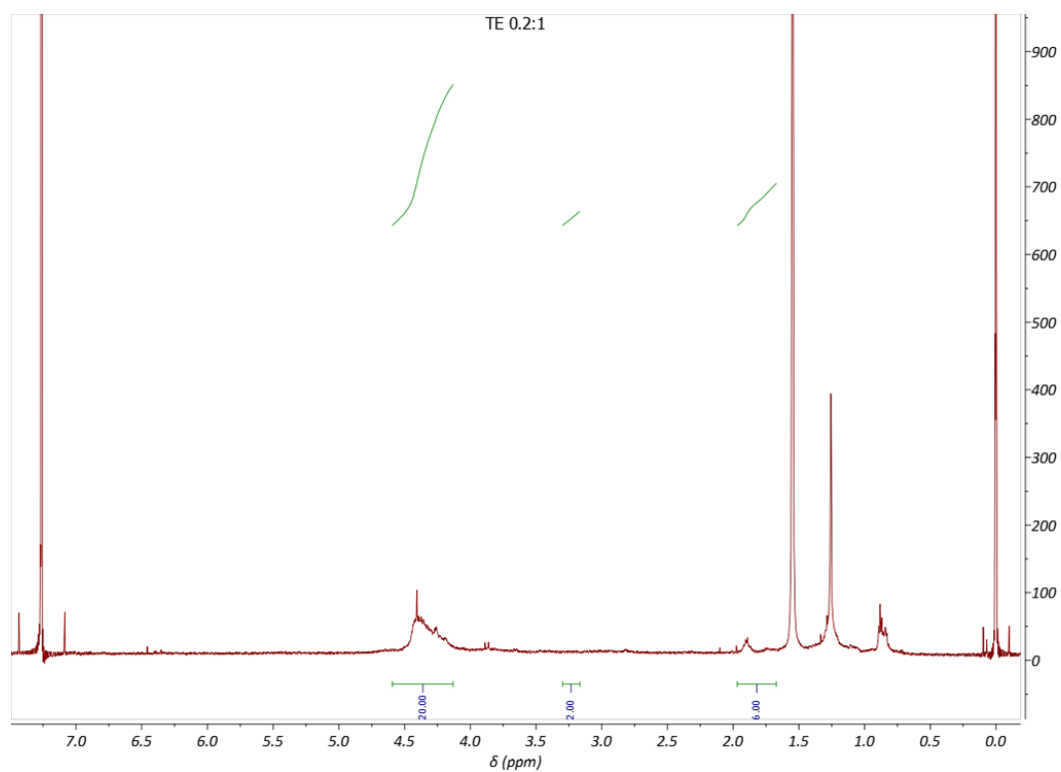

Figure S11.  $^1\text{H}$  NMR spectrum of product TE 0.2:1

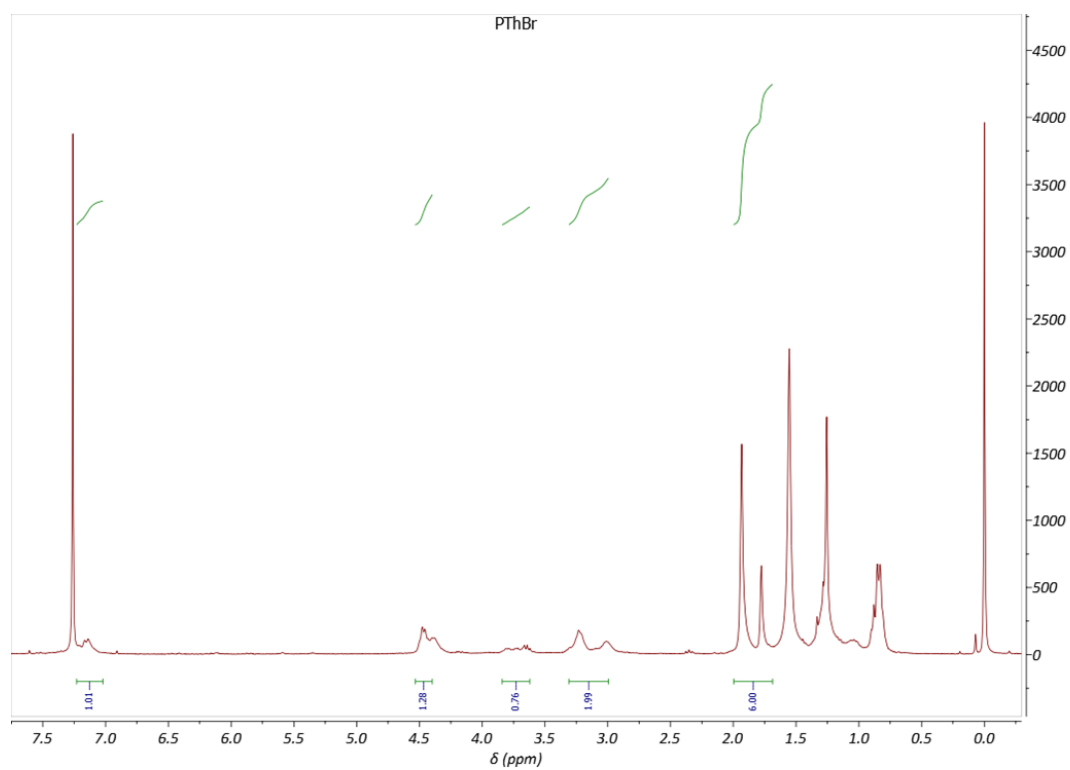

Figure S12.  $^1\text{H}$  NMR spectrum of PThBr
